# Supplementary material
Source: PubMed Central journal article supplement (PMC3219440)
Supplement: NIHMS71642-supplement-supplement_1.pdf [file NIHMS71642-supplement-supplement_1.pdf]

## Supplementary material

## Screening results in ER Binding, ERE-luciferase, and Alkaline Phosphatase Assays

| Plant or sample name and plant part                             | Extract Type                                                                                                                   | <sup>1</sup> Binding                                                                |         | <sup>2,3</sup> ERE-luc                                                                                                                |         | <sup>3,4</sup> ALP                                                                     |                | <sup>3,4</sup> SRB                                                                                         |         | <sup>1</sup> Binding                                                                     |         | <sup>2,3</sup> ERE-luc                                                                               |  |                                                                                 |
|-----------------------------------------------------------------|--------------------------------------------------------------------------------------------------------------------------------|-------------------------------------------------------------------------------------|---------|---------------------------------------------------------------------------------------------------------------------------------------|---------|----------------------------------------------------------------------------------------|----------------|------------------------------------------------------------------------------------------------------------|---------|------------------------------------------------------------------------------------------|---------|------------------------------------------------------------------------------------------------------|--|---------------------------------------------------------------------------------|
|                                                                 |                                                                                                                                | ER alpha                                                                            | ER beta | ER alpha                                                                                                                              | ER beta | Estrogenic                                                                             | Antiestrogenic | Cytotoxicity                                                                                               | ER beta | ER beta                                                                                  | ER beta | ER beta                                                                                              |  |                                                                                 |
| 17 $\beta$ estradiol                                            | Control                                                                                                                        | <b>95 <math>\pm</math> 1</b>                                                        |         | <b>21 <math>\pm</math> 7</b>                                                                                                          |         | <b>100 <math>\pm</math> 10</b>                                                         |                |                                                                                                            |         | <b>4 <math>\pm</math> 2</b>                                                              |         | <b>90 <math>\pm</math> 1</b>                                                                         |  |                                                                                 |
| 4-hydroxy tamoxifen                                             | Control                                                                                                                        | <b>96 <math>\pm</math> 1</b>                                                        |         | 1 $\pm$ 0.1                                                                                                                           |         | 0 $\pm$ 5                                                                              |                |                                                                                                            |         | 2 $\pm$ 1                                                                                |         | <b>94 <math>\pm</math> 1</b>                                                                         |  |                                                                                 |
| DMSO                                                            | Control                                                                                                                        | 0                                                                                   |         | 1 $\pm$ 0.2                                                                                                                           |         | 1 $\pm$ 2                                                                              |                |                                                                                                            |         | 1 $\pm$ 2                                                                                |         | 0                                                                                                    |  |                                                                                 |
| <i>Alisma plantago-aquatica</i><br>(Water Plantain)<br>rhizomes | Petroleum ether<br>Dichloromethane<br>75% ethanol                                                                              | 31 $\pm$ 5<br>25 $\pm$ 13<br>2 $\pm$ 2                                              |         | 0.9 $\pm$ 0.4<br>2.4 $\pm$ 1.5<br>1.2 $\pm$ 0.4                                                                                       |         | -7.3 $\pm$ 4.2<br>-9.8 $\pm$ 11<br>-10.4 $\pm$ 7.8                                     |                | -1.5 $\pm$ 13.3<br>3.3 $\pm$ 14<br>-2.1 $\pm$ 10.4                                                         |         | 10.7 $\pm$ 16.2<br>-5.7 $\pm$ 7.8<br>-17.8 $\pm$ 11.8                                    |         | <b>51 <math>\pm</math> 7</b><br>26 $\pm$ 3<br>8 $\pm$ 6                                              |  |                                                                                 |
| <i>Angelica sinensis</i><br>(Dang-Gui)<br>roots                 | <sup>5</sup> Methanol<br><sup>5</sup> Petroleum ether<br><sup>5</sup> Chloroform<br><sup>5</sup> Butanol<br><sup>5</sup> Water | 8 $\pm$ 7<br><b>81 <math>\pm</math> 10</b><br>19 $\pm$ 9<br>4 $\pm$ 3<br>7 $\pm$ 11 |         | 1.8 $\pm$ 0.5<br><b>9.7 <math>\pm</math> 3.5</b><br><b>5.9 <math>\pm</math> 3</b><br><b>9.5 <math>\pm</math> 2.2</b><br>1.3 $\pm$ 0.8 |         | -2.3 $\pm$ 5.5<br>-4.7 $\pm$ 6.2<br>12.3 $\pm$ 4.7<br>12.4 $\pm$ 8.2<br>-0.3 $\pm$ 1.2 |                | 15.3 $\pm$ 8.8<br><b>48.7 <math>\pm</math> 9.5</b><br>19.4 $\pm$ 9.8<br>-16.3 $\pm$ 4.5<br>-13.5 $\pm$ 2.5 |         | 3.1 $\pm$ 17.1<br>16.4 $\pm$ 13.6<br>30.6 $\pm$ 8<br>3.3 $\pm$ 15.2<br>-9.4 $\pm$ 6.1    |         | 34 $\pm$ 5<br><b>99 <math>\pm</math> 9</b><br><b>46 <math>\pm</math> 6</b><br>0 $\pm$ 2<br>0 $\pm$ 4 |  | 1.3 $\pm$ 0.6<br>1.1 $\pm$ 0.4<br>0.8 $\pm$ 0.5<br>1.2 $\pm$ 0.2<br>1 $\pm$ 0.1 |
| <i>Asclepias tuberosa</i><br>(Butterfly weed)<br>roots          | Petroleum ether<br>Dichloromethane<br>75% ethanol                                                                              | <b>69 <math>\pm</math> 7</b><br>16 $\pm$ 9<br>0 $\pm$ 2                             |         | 1.1 $\pm$ 0.4<br>4.1 $\pm$ 3.1<br>3.9 $\pm$ 4.3                                                                                       |         | -17.9 $\pm$ 15.5<br>-26.5 $\pm$ 4.5<br>-10.3 $\pm$ 8.9                                 |                | -9.1 $\pm$ 21<br>114.6 $\pm$ 6.7<br>110.1 $\pm$ 8.5                                                        |         | -19.9 $\pm$ 9.8<br><b>106.1 <math>\pm</math> 5.3</b><br><b>99.1 <math>\pm</math> 3.6</b> |         | <b>85 <math>\pm</math> 5</b><br>32 $\pm$ 10<br>5 $\pm$ 8                                             |  | 1.1 $\pm$ 0.8<br><b>10.7 <math>\pm</math> 0.8</b><br>1.3 $\pm$ 1.1              |
| <i>Beta vulgaris</i><br>(Beets)<br>roots                        | Petroleum ether<br>Dichloromethane<br>75% ethanol                                                                              | 35 $\pm$ 10<br>33 $\pm$ 11<br>6 $\pm$ 5                                             |         | <b>4.7 <math>\pm</math> 1.9</b><br>3.2 $\pm$ 2<br>1 $\pm$ 0.2                                                                         |         | -2.4 $\pm$ 17.4<br>-2.3 $\pm$ 5.5<br>-7.4 $\pm$ 10.4                                   |                | 4.4 $\pm$ 14.8<br><b>43.7 <math>\pm</math> 8.6</b><br>-8.7 $\pm$ 17.7                                      |         | -15.9 $\pm$ 29.4<br>-20.2 $\pm$ 30.9<br>-14 $\pm$ 33.7                                   |         | <b>44 <math>\pm</math> 7</b><br>30 $\pm$ 5<br>8 $\pm$ 13                                             |  | 1.1 $\pm$ 0.3<br>1.1 $\pm$ 0.1<br>1.1 $\pm$ 0.4                                 |
| <i>Cimicifuga americana</i><br>(Yellow cohosh)<br>roots         | Petroleum ether<br>Dichloromethane<br>75% ethanol                                                                              | 37 $\pm$ 8<br>31 $\pm$ 5<br>9 $\pm$ 8                                               |         | 1.6 $\pm$ 0.7<br>2.8 $\pm$ 1.1<br>1.1 $\pm$ 0.2                                                                                       |         | -5.8 $\pm$ 14.4<br>-16.2 $\pm$ 14.9<br>-4.4 $\pm$ 14.3                                 |                | 27.1 $\pm$ 27.5<br><b>79.2 <math>\pm</math> 19.5</b><br>-10 $\pm$ 12.4                                     |         | -3.7 $\pm$ 37<br>5.8 $\pm$ 32.1<br>-22.4 $\pm$ 25                                        |         | <b>47 <math>\pm</math> 10</b><br>21 $\pm$ 9<br>7 $\pm$ 6                                             |  | 1.4 $\pm$ 0.3<br>1.4 $\pm$ 0.6<br>1 $\pm$ 0.1                                   |

<sup>1</sup> Percent binding at 200  $\mu$ g/mL.

<sup>2</sup> Fold Induction where DMSO is 1.

<sup>3</sup> Tested at 20  $\mu$ g/mL.

<sup>4</sup> Percent induction (estrogenic), inhibition (antiestrogenic), or cytotoxic.

<sup>5</sup> Fraction instead of partition.

<sup>6</sup> Bold face-type indicates assay activity.

| Plant or sample name and plant part                                   | Extract Type    | <sup>1</sup> Binding |                    | <sup>2,3</sup> ERE-luc |                    | <sup>3,4</sup> ALP  |                | <sup>3,4</sup> SRB  |                | <sup>1</sup> Binding |         | <sup>2,3</sup> ERE-luc |         |
|-----------------------------------------------------------------------|-----------------|----------------------|--------------------|------------------------|--------------------|---------------------|----------------|---------------------|----------------|----------------------|---------|------------------------|---------|
|                                                                       |                 | ER alpha             | ER beta            | ER alpha               | ER beta            | Estrogenic          | Antiestrogenic | Cytotoxicity        | Cytotoxicity   | ER beta              | ER beta | ER beta                | ER beta |
| <i>Cimicifuga racemosa</i><br>(Black cohosh)<br>aerial parts          | DCM extract     | 34 ± 7               | <b>6.6 ± 3.2</b>   | -2.5 ± 1.3             | 3.5 ± 8.7          | 8.3 ± 5.2           |                | 8.3 ± 5.2           | 45 ± 3         | 1.1 ± 0.4            |         |                        |         |
|                                                                       | 75% EtOH        | 21 ± 5               | <b>5.8 ± 1.8</b>   | 4.3 ± 5.3              | <b>-48.4 ± 4.9</b> | 0.1 ± 5.7           |                | 0.1 ± 5.7           | 23 ± 3         | 1 ± 0.2              |         |                        |         |
|                                                                       | PE extract      | <b>55 ± 8</b>        | 3.2 ± 1.5          | -4.5 ± 4.8             | 21.3 ± 7.2         | 4.8 ± 10.9          |                | 4.8 ± 10.9          | <b>64 ± 8</b>  | 1 ± 0.5              |         |                        |         |
| <i>Cimicifuga rubrifolia</i><br>(Appalachian bugbane)<br>aerial parts | Petroleum ether | <b>56 ± 2</b>        | 2.5 ± 2            | -13.1 ± 12.4           | 33.2 ± 17          | -23.2 ± 25          |                | -23.2 ± 25          | <b>66 ± 6</b>  | 1.1 ± 0.5            |         |                        |         |
|                                                                       | Dichloromethane | <b>51 ± 5</b>        | <b>7.4 ± 1.1</b>   | 0.3 ± 15.9             | 21 ± 14.2          | 4.4 ± 19.8          |                | 4.4 ± 19.8          | 40 ± 8         | 0.8 ± 0.3            |         |                        |         |
|                                                                       | 75% ethanol     | 4 ± 3                | 2.3 ± 1.4          | 6 ± 13                 | -30.5 ± 22.1       | 6.8 ± 11.7          |                | 6.8 ± 11.7          | 4 ± 7          | 1.1 ± 0.6            |         |                        |         |
| <i>Cornus officinalis</i><br>(Dogwood)<br>fruits                      | Petroleum ether | 26 ± 16              | <b>24.3 ± 6.6</b>  | 2.6 ± 5.9              | 41.8 ± 4.1         | 11.5 ± 3.4          |                | 11.5 ± 3.4          | <b>48 ± 4</b>  | 1.5 ± 0.5            |         |                        |         |
|                                                                       | Dichloromethane | 0 ± 4                | 2.5 ± 0.7          | -2.2 ± 4.8             | 24.9 ± 5.2         | <b>30.6 ± 19.1</b>  |                | <b>30.6 ± 19.1</b>  | 0 ± 2          | 1.3 ± 0.3            |         |                        |         |
|                                                                       | 75% ethanol     | 17 ± 2               | 0.5 ± 0.7          | -0.2 ± 7.9             | -10.8 ± 6.3        | -8.9 ± 6.1          |                | -8.9 ± 6.1          | 5 ± 3          | 1 ± 0.5              |         |                        |         |
| <i>Daucus carota</i><br>(Carrots)<br>roots                            | Petroleum ether | 21 ± 6               | <b>12.3 ± 5.1</b>  | -6.8 ± 11.2            | -26.6 ± 14.6       | -18.7 ± 19.1        |                | -18.7 ± 19.1        | 36 ± 6         | 0.9 ± 0.5            |         |                        |         |
|                                                                       | Dichloromethane | 22 ± 5               | <b>5.4 ± 1.8</b>   | -5.7 ± 8               | -11.5 ± 16.1       | 13.7 ± 14.1         |                | 13.7 ± 14.1         | 26 ± 6         | 0.7 ± 0.2            |         |                        |         |
|                                                                       | 75% ethanol     | 8 ± 8                | 0.8 ± 0.6          | -7.7 ± 8.7             | -19.5 ± 14.9       | -6.3 ± 9.5          |                | -6.3 ± 9.5          | 19 ± 10        | 1 ± 0.5              |         |                        |         |
| <i>Paeonia moutan</i><br>(Peony)<br>bark                              | Petroleum ether | 21 ± 5               | 2.8 ± 1            | -9.7 ± 11.4            | 8.7 ± 16.7         | 7.7 ± 19.7          |                | 7.7 ± 19.7          | <b>60 ± 6</b>  | 2 ± 1.7              |         |                        |         |
|                                                                       | Dichloromethane | 19 ± 6               | 3.4 ± 2.8          | -10.7 ± 13             | 24.4 ± 14.7        | 11.5 ± 16.1         |                | 11.5 ± 16.1         | 19 ± 5         | 1.8 ± 0.2            |         |                        |         |
|                                                                       | 75% ethanol     | 14 ± 13              | 0.8 ± 0.3          | -10 ± 8.9              | -30.2 ± 22.7       | -10.1 ± 18.3        |                | -10.1 ± 18.3        | 3 ± 5          | 1 ± 0.4              |         |                        |         |
| <sup>7</sup> <i>Polygonum multiflorum</i><br>(Fo-Ti)<br>roots         | Petroleum ether | 15 ± 8               | <b>21.7 ± 8.5</b>  | 6.5 ± 1.8              | 1.2 ± 3.3          | 7.6 ± 14.3          |                | 7.6 ± 14.3          | <b>50 ± 9</b>  | 1.4 ± 0.7            |         |                        |         |
|                                                                       | Dichloromethane | 30 ± 7               | <b>25.8 ± 11.2</b> | 12.3 ± 3.4             | 0.4 ± 12.3         | 12.7 ± 17.8         |                | 12.7 ± 17.8         | 36 ± 13        | 3 ± 2.5              |         |                        |         |
|                                                                       | 75% ethanol     | 4 ± 3                | 1.5 ± 0.2          | 0.7 ± 3.3              | 3.9 ± 18.2         | 2.7 ± 7.5           |                | 2.7 ± 7.5           | 0 ± 3          | 1.2 ± 1.1            |         |                        |         |
| <sup>8</sup> <i>Polygonum multiflorum</i><br>(Fo-Ti)<br>roots         | Petroleum ether | 22 ± 16              | <b>15.1 ± 9.1</b>  | -1.5 ± 0.6             | 36.1 ± 48.6        | 18.4 ± 22.6         |                | 18.4 ± 22.6         | 26 ± 9         | 1.2 ± 0.9            |         |                        |         |
|                                                                       | Dichloromethane | 16 ± 5               | <b>16 ± 3.4</b>    | -0.2 ± 1.6             | 68.3 ± 11.5        | <b>31.1 ± 19.1</b>  |                | <b>31.1 ± 19.1</b>  | 16 ± 7         | 0.9 ± 0.7            |         |                        |         |
|                                                                       | 75% ethanol     | 5 ± 3                | 0.7 ± 0.2          | -0.4 ± 2.5             | 16.5 ± 26.2        | 18 ± 20.5           |                | 18 ± 20.5           | 0 ± 3          | 1 ± 0.2              |         |                        |         |
| <i>Pueraria lobata</i><br>(Kudzu)<br>aerial parts                     | Petroleum ether | 32 ± 2               | <b>10.3 ± 2.8</b>  | -10.8 ± 12.6           | <b>46.9 ± 18.9</b> | 12.7 ± 30           |                | 12.7 ± 30           | 36 ± 2         | 1.5 ± 1.4            |         |                        |         |
|                                                                       | Dichloromethane | <b>63 ± 6</b>        | <b>24.5 ± 9.9</b>  | -0.3 ± 25.6            | 36 ± 32.6          | -3.3 ± 5.5          |                | -3.3 ± 5.5          | <b>45 ± 19</b> | 1.2 ± 0.5            |         |                        |         |
|                                                                       | 75% ethanol     | 17 ± 16              | <b>26.9 ± 12.7</b> | -1.3 ± 13.8            | 28.9 ± 40.7        | 7.6 ± 50.1          |                | 7.6 ± 50.1          | <b>63 ± 3</b>  | <b>3.5 ± 1.3</b>     |         |                        |         |
| <i>Pueraria mirifica</i><br>(Kwao Keur)<br>bark                       | Petroleum ether | 12 ± 8               | <sup>9</sup> N.T.  | -2.7 ± 2.6             | 58.5 ± 37          | <b>100.6 ± 38.8</b> |                | <b>100.6 ± 38.8</b> | 18 ± 12        | N.T.                 |         |                        |         |
|                                                                       | Dichloromethane | 12 ± 5               | <b>25.7 ± 9.5</b>  | -4.2 ± 1.1             | 101.1 ± 8.6        | <b>115 ± 2.2</b>    |                | <b>115 ± 2.2</b>    | 19 ± 11        | 3.2 ± 1.6            |         |                        |         |
|                                                                       | 75% ethanol     | 18 ± 7               | <b>28 ± 8.6</b>    | -1.4 ± 4.8             | 52.2 ± 61          | <b>60.4 ± 62.2</b>  |                | <b>60.4 ± 62.2</b>  | 31 ± 8         | 2.4 ± 1.3            |         |                        |         |
| <i>Valeriana officinalis</i><br>(Valerian)                            | Petroleum ether | <b>43 ± 11</b>       | <b>7.2 ± 3.1</b>   | -7.8 ± 7.6             | 33.7 ± 16.8        | 12.5 ± 19.3         |                | 12.5 ± 19.3         | <b>81 ± 4</b>  | 1.3 ± 0.8            |         |                        |         |
|                                                                       | Dichloromethane | 13 ± 12              | <b>5.9 ± 1.6</b>   | -8.5 ± 7.7             | 19.4 ± 8.2         | -7.6 ± 21           |                | -7.6 ± 21           | 13 ± 6         | 0.7 ± 0.1            |         |                        |         |

<sup>7</sup> BC number 268.

<sup>8</sup> BC number 286.

<sup>9</sup> Not tested due to the limited quantities available.

| Plant or sample name<br>and plant part               | Extract Type    | <sup>1</sup> Binding |                  | <sup>2,3</sup> ERE-luc |              | <sup>3,4</sup> ALP |               | <sup>3,4</sup> SRB |           | <sup>1</sup> Binding |         | <sup>2,3</sup> ERE-luc |  |
|------------------------------------------------------|-----------------|----------------------|------------------|------------------------|--------------|--------------------|---------------|--------------------|-----------|----------------------|---------|------------------------|--|
|                                                      |                 | ER alpha             | ER alpha         | ER alpha               | Estrogenic   | Antiestrogenic     | Cytotoxicity  | ER beta            | ER beta   | ER beta              | ER beta |                        |  |
| roots                                                | 75% ethanol     | 12 ± 6               | 1.7 ± 1.1        | -10.4 ± 9.5            | -0.8 ± 5.4   | -18.9 ± 15.6       | 7 ± 11        | 7 ± 11             | 1.1 ± 0.5 |                      |         |                        |  |
| <i>Viburnum opulus</i><br>(Guelder Rose)<br>bark     | Petroleum ether | 17 ± 17              | 1.3 ± 0.4        | -0.3 ± 0.9             | -2.1 ± 5.8   | 7.1 ± 12.6         | 11 ± 8        | 11 ± 8             | 1.2 ± 0.6 |                      |         |                        |  |
|                                                      | Dichloromethane | 11 ± 4               | 1.4 ± 0.2        | 1.6 ± 1.4              | 14 ± 7.4     | 22.5 ± 4           | 6 ± 2         | 6 ± 2              | 0.8 ± 0.2 |                      |         |                        |  |
|                                                      | 75% ethanol     | 22 ± 10              | 1.4 ± 0.3        | -1.2 ± 0.7             | -17.5 ± 11.4 | 11.4 ± 6.9         | 24 ± 16       | 24 ± 16            | 0.7 ± 0.6 |                      |         |                        |  |
| <i>Viburnum prunifolium</i><br>(Black Haw)<br>bark   | Petroleum ether | 12 ± 6               | 0.8 ± 0.3        | -3.7 ± 0.7             | -9.8 ± 0.8   | 7.7 ± 5.7          | 6 ± 3         | 6 ± 3              | 1 ± 0.5   |                      |         |                        |  |
|                                                      | Dichloromethane | 3 ± 6                | 0.7 ± 0.5        | -3.5 ± 3               | 68.5 ± 6.3   | <b>42 ± 4.4</b>    | 3 ± 4         | 3 ± 4              | 1 ± 0     |                      |         |                        |  |
|                                                      | 75% ethanol     | 10 ± 10              | 4.9 ± 3.7        | -0.5 ± 2.2             | -33 ± 7.9    | -2.7 ± 11.2        | 3 ± 9         | 3 ± 9              | 0.9 ± 0.6 |                      |         |                        |  |
| <i>Vitex agnus-castus</i><br>(Chasteberry)<br>fruits | Petroleum ether | 37 ± 6               | <b>9.5 ± 2.5</b> | -1.1 ± 1.6             | 43.5 ± 3.3   | <b>39.1 ± 8.3</b>  | <b>68 ± 9</b> | <b>68 ± 9</b>      | 1.1 ± 0.7 |                      |         |                        |  |
|                                                      | Dichloromethane | 13 ± 3               | <b>9.6 ± 6.6</b> | -2.3 ± 1.5             | 94.5 ± 7.2   | <b>112.5 ± 8.8</b> | 20 ± 19       | 20 ± 19            | 0.8 ± 0.3 |                      |         |                        |  |
|                                                      | 75% ethanol     | 10 ± 8               | 2.3 ± 0.9        | -1.5 ± 2.7             | -14.3 ± 7.6  | 2.3 ± 7.9          | 7 ± 7         | 7 ± 7              | 1.3 ± 0.7 |                      |         |                        |  |
